# Supplementary material for: Optimization of Heterotrophic Culture Conditions for the Microalgae Euglena gracilis to Produce Proteins
Source: MDPI journal article supplement (doi:10.3390/md21100519), 2023-09-29
Supplement: s1 [file s1]

## ***Supplementary Material***

### **Optimization of heterotrophic culture conditions for the microalgae *Euglena gracilis* to produce proteins**

**Weiying Xie**<sup>1,2,3,4</sup>, **Xiaojie Li**<sup>2,3</sup>, **Huo Xu**<sup>1,4</sup>, **Feng Chen**<sup>2,3</sup>, **Ka-Wing Cheng**<sup>2,3</sup>, **Hongbin Liu**<sup>4,5\*\*</sup>, **Bin Liu**<sup>2,3\*\*</sup>

<sup>1</sup> SZU-HKUST Joint Ph.D. Program in Marine Environmental Science, Shenzhen University, Shenzhen, China

<sup>2</sup> Shenzhen Key Laboratory of Marine Microbiome Engineering, Institute for Advanced Study, Shenzhen University, Shenzhen, China

<sup>3</sup> Institute for Innovative Development of Food Industry, Shenzhen University, Shenzhen, China

<sup>4</sup> Department of Ocean Science, The Hong Kong University of Science and Technology, Hong Kong, SAR, China

<sup>5</sup> Hong Kong Branch of Southern Marine Science & Engineering Guangdong Laboratory, The Hong Kong University of Science and Technology, Hong Kong, SAR, China

#### **Correspondence:**

Bin Liu: liubin@szu.edu.cn

Hongbin Liu: liuhb@ust.hk

## 1 Supplementary Figures and Tables

### 1.1 Supplementary Figures

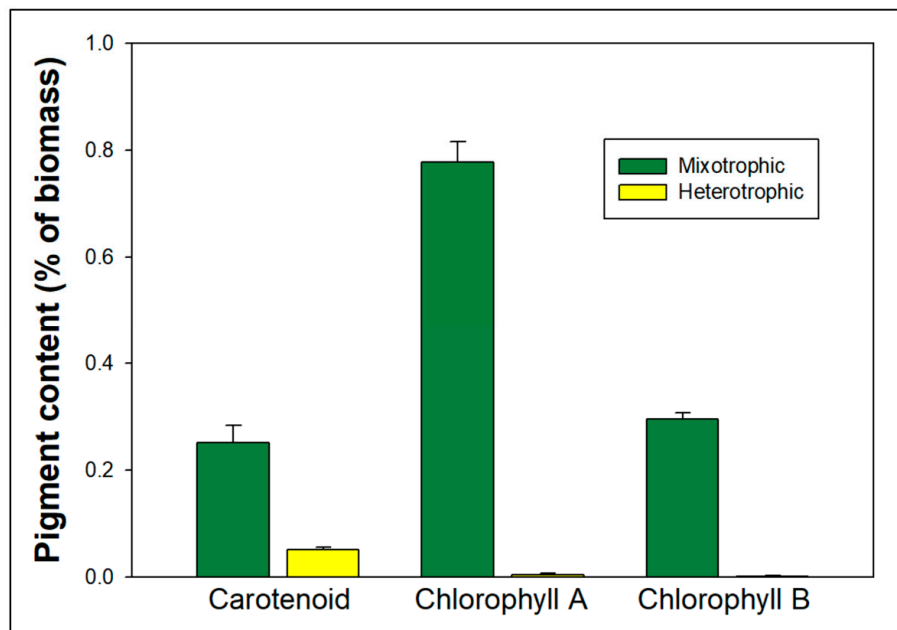

**Figure S1.** Carotenoid, chlorophyll a and b content of *E. gracilis* under mixotrophic and heterotrophic cultivation.

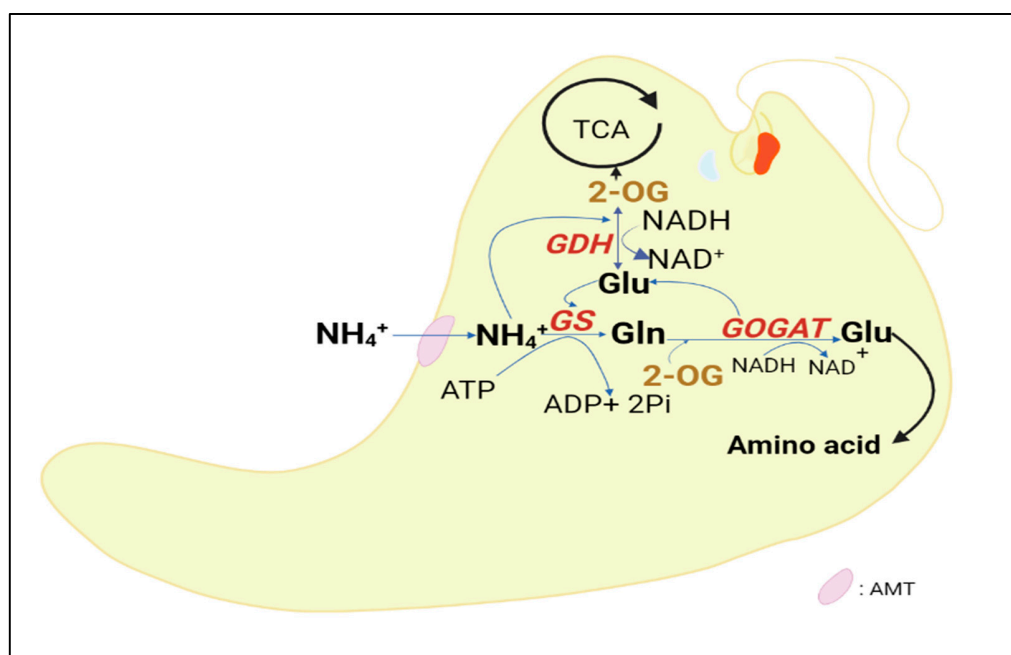

**Figure S2.** Nitrogen assimilation pathway (GS: glutamine synthase; GOGAT: glutamate synthase; GDH: glutamate dehydrogenase; Gln: Glutamine; Glu: glutamic acid; 2-OG: 2-oxoglutarate; MSG: monosodium glutamate; AMT: ammonium transporter).

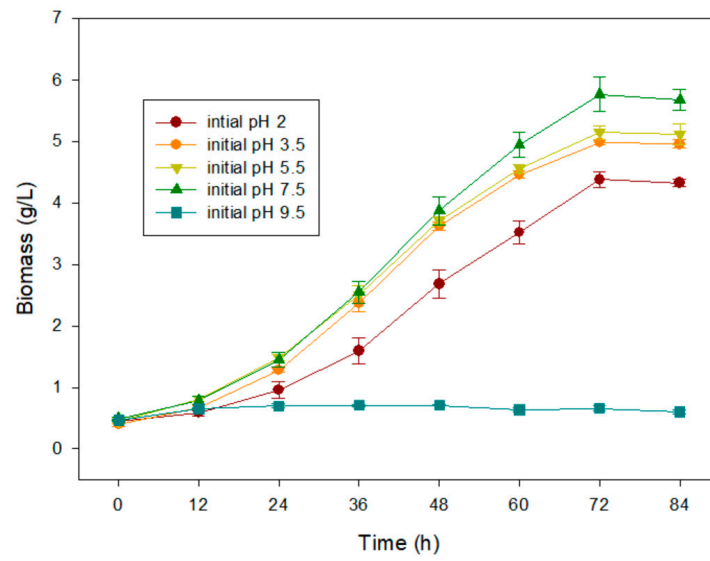

**Figure S3.** Growth curve of *E. gracilis* cultured under different initial pH.

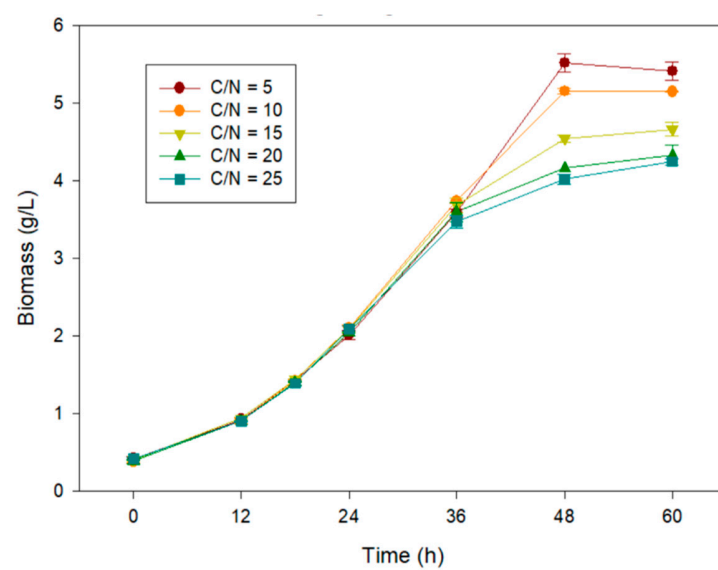

**Figure S4.** Growth curve of *E. gracilis* cultured under different C/N.

## 1.2 Supplementary Tables

**Table S1.** The maximum specific growth rate of heterotrophic *E. gracilis* under different temperature

| Temperature (°C)                  | 25                  | 28                  | 32                  | 35                  |
|-----------------------------------|---------------------|---------------------|---------------------|---------------------|
| Maximum specific growth rate (/h) | $0.049 \pm 0.001^a$ | $0.058 \pm 0.001^b$ | $0.069 \pm 0.002^c$ | $0.061 \pm 0.003^b$ |

Note: <sup>a-b</sup> Row values with same superscript letter displays not significantly different ( $p < 0.05$ ).
